# Supplementary material
Source: PubMed Central journal article supplement (PMC4702636)
Supplement: AEM.02803-15_zam999116830so1.pdf [file AEM.02803-15_zam999116830so1.pdf]

## **Supplementary information**

### **Tissue plasminogen activator coating on surface of implants reduces *Staphylococcus aureus* biofilm formation**

Jakub Kwiecinski<sup>1</sup>, Manli Na<sup>1</sup>, Anders Jarneborn<sup>1</sup>, Gunnar Jacobsson<sup>3</sup>, Marijke Peetermans<sup>2</sup>, Peter Verhamme<sup>2</sup>, Tao Jin<sup>1</sup>

1. Department of Rheumatology and Inflammation Research, Institution of Medicine, Sahlgrenska Academy at University of Gothenburg, S-41346 Göteborg, Sweden

2. Center for Molecular and Vascular Biology, Department of Cardiovascular Sciences, University of Leuven, Leuven, Belgium

3. Department of Infectious Diseases, Skaraborg Hospital, 54185 Skövde, Sweden

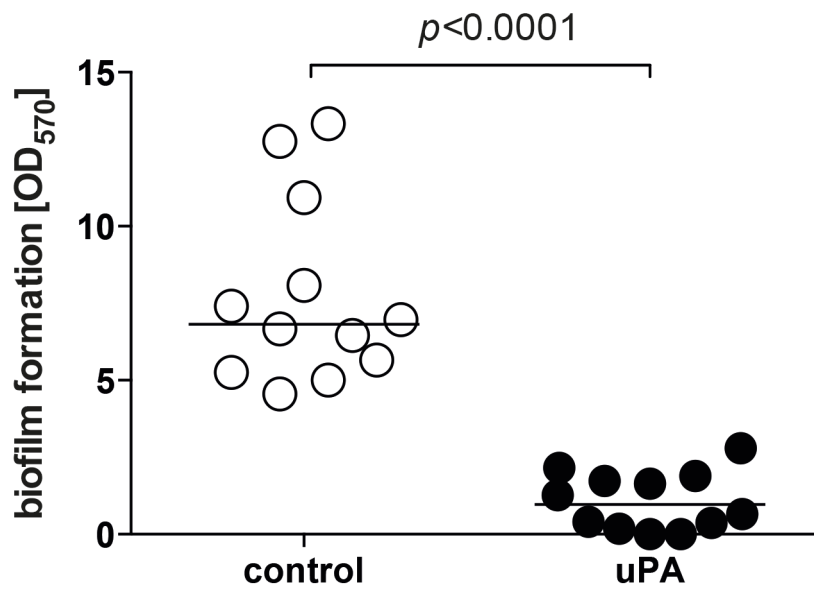

**Figure S1. Coating of urokinase plasminogen activator (uPA) reduces *S. aureus* biofilm formation on polystyrene surfaces.** Biofilm formation on uPA-coated or buffer-treated polystyrene surfaces by *S. aureus* LS-1 after overnight culture in TSB with 50% heparinised human plasma. The microplate colorimetric assay was used. Data are presented as scatter dot plot with mean.

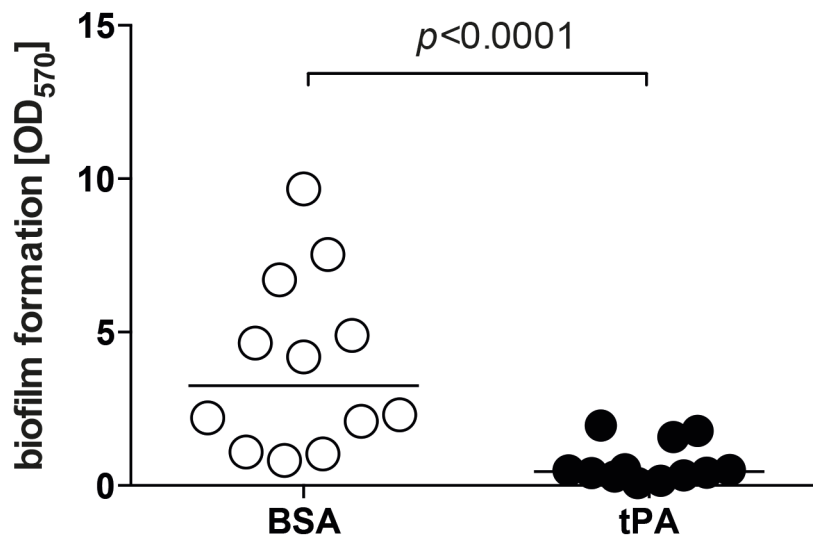

**Figure S2. Anti-biofilm activity of tPA was not due to unspecific effects of protein surface coating.** Biofilm formation on tPA-coated or bovine serum albumin (BSA)-treated polystyrene surfaces by *S. aureus* LS-1 after overnight culture in TSB with 50% heparinised human plasma. The microplate colorimetric assay was used. Data are presented as scatter dot plot with mean.
